# 1 Transmission of SARS-CoV-2 in 2 domestic cats imposes a narrow 3 bottleneck

4 Katarina M. Braun<sup>1\*</sup>, Gage K. Moreno<sup>2\*</sup>, Peter J. Halfmann<sup>1,4</sup>, David A. Baker<sup>2</sup>, Emma C.  
5 Boehm<sup>1</sup>, Andrea M. Weiler<sup>1,3</sup>, Amelia K. Haj<sup>2</sup>, Masato Hatta<sup>1,4</sup>, Shiho Chiba<sup>1,4</sup>, Tadashi  
6 Maemura<sup>1,4</sup>, Yoshihiro Kawaoka<sup>1,4</sup>, Katia Koelle<sup>5</sup>, David H. O'Connor<sup>2,3</sup>, Thomas C. Friedrich<sup>1,3</sup>

7 \*These authors contributed equally

8

9 <sup>1</sup>Department of Pathobiological Sciences, University of Wisconsin-Madison, Madison, WI,  
10 United States of America

11 <sup>2</sup>Department of Pathology and Laboratory Medicine, University of Wisconsin-Madison, Madison,  
12 WI, United States of America

13 <sup>3</sup>Wisconsin National Primate Research Center, University of Wisconsin-Madison, Madison, WI,  
14 United States of America

15 <sup>4</sup>Influenza Research Institute, School of Veterinary Sciences, University of Wisconsin-Madison,  
16 Madison, WI, United States

17 <sup>5</sup>Department of Biology, Emory University, Atlanta, GA, United States of America

## 18 Abstract

19 The evolutionary mechanisms by which SARS-CoV-2 viruses adapt to mammalian hosts and,  
20 potentially, escape human immunity depend on the ways genetic variation is generated and  
21 selected within and between individual hosts. Using domestic cats as a model, we show that  
22 SARS-CoV-2 consensus sequences remain largely unchanged over time within hosts, but  
23 dynamic sub-consensus diversity reveals processes of genetic drift and weak purifying  
24 selection. Transmission bottlenecks in this system appear narrow, with new infections being  
25 founded by fewer than ten viruses. We identify a notable variant at amino acid position 655 in  
26 Spike (H655Y) which arises rapidly in index cats and becomes fixed following transmission in  
27 two of three pairs, suggesting this site may be under positive selection in feline hosts. We  
28 speculate that narrow transmission bottlenecks and the lack of pervasive positive selection  
29 combine to constrain the pace of ongoing SARS-CoV-2 adaptive evolution in mammalian hosts.

## 30 Introduction

31 Understanding the forces that shape genetic diversity of RNA viruses as they replicate within,  
32 and are transmitted between, hosts may help us to forecast the future evolutionary trajectories  
33 of viruses on larger scales. The level and duration of protection provided by vaccines,  
34 therapeutics, and natural immunity against severe acute respiratory syndrome coronavirus 2  
35 (SARS-CoV-2) will depend in part on the amount of circulating viral variation and the rate at  
36 which adaptive mutations arise within hosts, persist between hosts, and become widespread.  
37 Here, to model the evolutionary capacity of SARS-CoV-2 within and between hosts, we  
38 characterize viral genetic diversity arising, persisting, and being transmitted in domestic cats.

39 A translational animal model can serve as a critical tool to study within- and between-host  
40 genetic variation of SARS-CoV-2 viruses. SARS-CoV-2 productively infects Syrian hamsters,  
41 rhesus macaques, cynomolgus macaques, ferrets, cats, and dogs in laboratory experiments.  
42 Natural infection with SARS-CoV-2 has also been documented in ferrets, mink, dogs, and small  
43 and large cats which makes each of these viable animal models <sup>1-5</sup>. Among these species,  
44 natural transmission has only been observed in mink, cats, and ferrets <sup>1,6,7</sup>. Very recently,  
45 transmission from humans to mink back to humans has been documented <sup>8</sup>. Infectious virus has  
46 been recovered from various upper- and mid-respiratory tissues in cats and ferrets, including  
47 nasal turbinates, soft palate, tonsils, and trachea <sup>1,6</sup>. However, only in cats has infectious virus  
48 been recovered from lower respiratory tract lung parenchyma, where infection is most  
49 commonly linked to severe disease in humans <sup>1,6,9,10</sup>.

50 In a recent study, members of our team experimentally infected three index cats with a SARS-  
51 CoV-2 human isolate and introduced one naive direct contact cat per index one day following  
52 index inoculation <sup>11</sup>. Each index cat transmitted SARS-CoV-2 to the corresponding contact cat,  
53 and infectious virus was recovered from all six cats over multiple timepoints <sup>11</sup>. This study was  
54 designed to address whether SARS-CoV-2 could infect and transmit between cats so viruses  
55 collected from this study were not characterized beyond determining viral titers. Here, we use  
56 deep sequencing to define patterns of SARS-CoV-2 genetic variation over time within the index  
57 cats and following transmission to the contact cats.

58 Transmission bottlenecks – dramatic reductions in viral population size at the time of  
59 transmission – play an essential role in the overall pace of evolution of respiratory viruses <sup>12-21</sup>.  
60 For example, in humans airborne transmission of seasonal influenza viruses appears to involve  
61 a narrow transmission bottleneck, with new infections founded by as few as 1-2 genetically  
62 distinct viruses <sup>13,14,17-19</sup>. When transmission involves the transfer of very few variants, even

63 beneficial variants present at low frequencies below consensus in the transmitting host are likely  
64 to be lost. Accordingly, antigenic escape variants can sometimes be detected in acute influenza  
65 virus infections, and selective transmission of such variants has not been observed in nature  
66 <sup>22,22,23</sup>. Narrow transmission bottlenecks in which natural selection is weak are expected to slow  
67 the pace of seasonal influenza virus adaptation <sup>12,24</sup> and may have similar effects on SARS-  
68 CoV-2.

69 Accurate estimation of the SARS-CoV-2 transmission bottleneck size could therefore aid in  
70 forecasting future viral evolution. Previous studies have reported discordant estimates of SARS-  
71 CoV-2 transmission bottleneck sizes in humans, ranging from “narrow” transmission bottlenecks  
72 involving 1-8 virions to “wide” bottlenecks involving 100-1,000 virions <sup>25-28</sup>. However, studies of  
73 natural viral transmission in humans can be confounded by uncertainties regarding the timing of  
74 infection and directionality of transmission, and longitudinal samples that can help resolve  
75 ambiguities are rarely available. Animal models overcome many of these uncertainties by  
76 providing access to longitudinal samples in well-defined index and contact infections with known  
77 timing.

78 Here we use a cat transmission model to show that SARS-CoV-2 genetic diversity is largely  
79 shaped by genetic drift and purifying selection. This finding is in broad agreement with recent  
80 analyses of evolutionary forces acting on SARS-CoV-2 in humans <sup>25,27-32</sup>. Our results further  
81 suggest that human SARS-CoV-2 isolates are relatively well-adapted to feline hosts, and that  
82 cat models recapitulate key aspects of SARS-CoV-2 evolution in humans. Notably, we estimate  
83 narrow bottlenecks in cats, involving transmission of only 2-6 viruses, consistent with the subset  
84 of studies in humans that have reported small bottleneck sizes <sup>25-28</sup>. We posit that the cat  
85 transmission model will be useful for investigating within- and between-host evolution of SARS-  
86 CoV-2 viruses.

## 87 Results

### 88 Within-host diversity of SARS-CoV-2 in cats is limited

89 Recently, members of our team inoculated three domestic cats with a second-passage SARS-  
90 CoV-2 human isolate from Tokyo (hCoV-19/Japan/UT-NCGM02/2020)<sup>11</sup>. Each index cat was  
91 co-housed with a naive contact cat beginning on day 1 post-inoculation (DPI). No new cat  
92 infections were performed for this study. Nasal swabs were collected daily up to 10 days post-  
93 inoculation, **Fig 1**. Viral RNA burden is plotted in **Supplementary Fig 1A** and infectious viral  
94 titers are shown in **Supplementary Fig 1B**.

95 Using conservative variant-calling frequency thresholds previously established for tiled-amplicon  
96 sequencing, we called within-host variants (both intrahost single-nucleotide variants “iSNVs”  
97 and short insertions and deletions “indels”) throughout the genome against the inoculum SARS-  
98 CoV-2 reference (Genbank: MW219695.1)<sup>33,34</sup>. Variants were required to be present in  
99 technical replicates at  $\geq 3\%$  and  $\leq 97\%$  of sequencing reads<sup>35</sup> (all within-host variants detected  
100 at  $>97\%$  frequency were assumed to be fixed; see Methods for details). iSNVs were detected at  
101 least once at 38 different genome sites. Of the 38 unique variants, 14 are synonymous changes,  
102 23 are nonsynonymous changes, and one occurs in an intergenic region; this distribution is  
103 similar to recent reports of SARS-CoV-2 variation in infected humans<sup>30</sup>. Similarly, we detected  
104 indels occurring at 11 different genome sites across all animals and timepoints. We identified 6-  
105 19 distinct variants per cat, of which 4-7 were observed on two or more days over the course of  
106 the infection within each cat (**Supplementary Fig 6**). All variants (iSNVs and indels) are plotted  
107 by genome location and frequency in **Fig 2A**.

## 108 Genetic drift and purifying selection shape within-host diversity

109 To probe the evolutionary pressures shaping SARS-CoV-2 viruses within hosts, we first  
110 evaluated the proportion of variants shared between cats. Eighty-six percent of variants (42 out  
111 of 38 iSNVs and 11 indels) were found in a single cat (42/49), 8% of variants were found in 2-5  
112 cats (4/49), and the remaining 6% of variants were found in all 6 cats (3/49).

113 Purifying selection, which acts to purge deleterious mutations from a population, is known to  
114 result in an excess of low-frequency variants. In contrast, positive selection results in the  
115 accumulation of intermediate- and high-frequency variation <sup>36</sup>. Importantly, especially in the  
116 setting of an acute viral infection, exponential population growth is also expected to result in an  
117 excess of low-frequency variants <sup>37</sup>. To determine the type of evolutionary pressure acting on  
118 SARS-CoV-2 in cats, we plotted these distributions against a simple “neutral model”  
119 (transparent grey bars in **Fig 2B**), which assumes a constant population size and the absence  
120 of selection <sup>36</sup>. This model predicted that ~43% of polymorphisms would fall in the 3-10%  
121 frequency bin, ~25% into the 10-20% bin, ~14% into the 20-30% bin, ~10% into the 30-40% bin,  
122 and ~8% into the 40-50% bin. The frequency distribution of variants detected in each index cat  
123 across all available timepoints did not differ significantly from this “neutral” expectation  
124 ( $p=0.265$ ,  $p=0.052$ ,  $p=0.160$ , respectively; Mann Whitney U test).

125 Next we compared nonsynonymous ( $\pi N$ ) and synonymous ( $\pi S$ ) pairwise nucleotide diversity to  
126 further evaluate the evolutionary forces shaping viral populations in index and contact animals  
127 <sup>38</sup>. Broadly speaking, excess nonsynonymous polymorphism ( $\pi N/\pi S > 1$ ) points toward  
128 diversifying or positive selection while excess synonymous polymorphism ( $\pi N/\pi S < 1$ ) indicates  
129 purifying selection. When  $\pi N / \pi S$ , is approximately 1 genetic drift – stochastic changes in the  
130 frequency of viral genotypes over time – can be an important force shaping genetic diversity.

131 We observe that  $\pi_S$  exceeds or approximately equal to  $\pi_N$  in most genes, although there is  
132 substantial variation among genes and cats (**Supplementary Table 1**).  $\pi_S$  is significantly higher  
133 than  $\pi_N$  in all 3 index cats in Spike ( $p=0.005$ ,  $p=0.004$ ,  $p=0.019$ , unpaired t-test) and ORF1ab  
134 ( $p=2.11e-05$ ,  $p=1.84e-06$ ,  $p=1.99e-06$ , unpaired t-test) and in index cats 2 and 3 in ORF8  
135 ( $p=0.03$ ,  $p=0.04$ , , unpaired t-test).  $\pi_S$  and  $\pi_N$  are not significantly different in at least one index  
136 cat in ORF3a, envelope, and nucleocapsid. There was not enough genetic variation to measure  
137 nucleotide diversity in the remaining four genes (**Supplementary Table 1**). Taken together,  
138 these results suggest longitudinal genetic variation within feline hosts is principally shaped by  
139 genetic drift with purifying selection acting on individual genes, particularly ORF1ab and Spike.

## 140 Longitudinal sampling reveals few consensus-level changes 141 within hosts

142 The consensus sequence recovered from all three index cats on the first day post-inoculation  
143 was identical to the inoculum or “stock” virus. This consensus sequence remained largely  
144 unchanged throughout infection in all index cats with the notable exception of two variants:  
145 H655Y in Spike (nucleotide site 23,525) and a synonymous change at amino acid position 67 in  
146 envelope (nucleotide site 26,445; S67S) arose rapidly in all 3 index cats and rose to consensus  
147 levels ( $\geq 50\%$  frequency) at various timepoints throughout infection in all index cats. Neither of  
148 these iSNVs were detected above 3% frequency in the inoculum, but when we mined all  
149 sequencing reads, S H655Y and E S67S can be detected at 0.85% and 0.34% in the inoculum,  
150 respectively. S H655Y was the consensus sequence on days 2-5 and days 7-8 in index cat 1 as  
151 well as on days 4 and 8 in index cat 2 and remained detectable above our 3% variant threshold  
152 throughout infection (**Fig 3**). Similarly, envelope S67S (E S67S) was the consensus sequence  
153 on day 8 in index cat 1 and day 1 in index cat 2. S H655Y and E S67S) were detectable at all

154 timepoints in cat 3 on days that SARS-CoV-2 was detectable  $\geq 10^4$  copies/mL and day 8 but  
155 stayed below consensus level.

156 Interestingly, S H655Y and E S67S became fixed together following transmission in two  
157 transmission pairs (contact cats 4 and 6) and were lost together during transmission to contact  
158 animal 5. In cat 5, however, two different variants in ORF1ab, G1756G and L3606F, became  
159 fixed after transmission. ORF1ab G1756G was not detected above 3% and L3606F was found  
160 at 17.2% in the day 5 sample from the index cat 2 (the cat transmitting to cat 5), and  
161 interestingly was not found in the inoculum at any detectable frequency. The categorical loss or  
162 fixation of these variants immediately following transmission, and in particular the fixation  
163 following transmission of a variant that was undetectable before, are highly suggestive of a  
164 narrow bottleneck <sup>39</sup>.

165 In addition, a synonymous variant in an alanine codon at amino acid position 1,222 in Spike  
166 (nucleotide site 25,174) was found at >50% frequencies on days 4 and 8 in index cat 3, but was  
167 not detected above 3% on any other days. All iSNVs over time are shown in **Supplementary**  
168 **Fig 6** and all indels over time are shown in **Supplementary Fig 7**. These within-host analyses  
169 show that genetic drift appears to play a prominent role in shaping low-frequency genetic  
170 variation within hosts.

171 **SARS-CoV-2 transmission in domestic cats is defined by a**  
172 **narrow transmission bottleneck**

173 To estimate the size of SARS-CoV-2 transmission bottlenecks, we investigated the amount of  
174 genetic diversity lost following transmission in cats. We observed a reduction in the cumulative  
175 number of variants detected in each contact cat compared to its associated index: 7 fewer



176 variants in cat 4 (n=9) compared to cat 1 (n=16), 10 fewer in cat 5 (n=19) than cat 2 (n=10), and  
177 10 fewer in cat 6 (n=16) than cat 3 (n=6). Likewise, the frequency distribution of variants in all  
178 three contact cats following transmission differed from the distribution of variants in all three  
179 index cats prior to transmission ( $p$ -value=0.052, Mann Whitney U test). Following transmission,  
180 variant frequencies became more bimodally distributed than those observed in index cats, i.e.,  
181 in contacts most variants were either very low-frequency or near-fixed (**Supplementary Fig 6**).

182 To quantitatively investigate the stringency of each transmission event, we compared the  
183 genetic composition of viral populations immediately before and after viral transmission. We  
184 chose to use the first timepoint when infectious virus was recovered in the contact cat coupled  
185 with the timepoint immediately preceding this day in the index cat, as has been done previously  
186 <sup>18</sup>. We used days 2 (index) and 3 (contact) in pair 1, days 5 and 6 in pair 2, and days 4 and 5 in  
187 pair 3 (these sampling days are outlined in red in **Fig 1**). We applied the beta-binomial sampling  
188 method developed by Sobel-Leonard et al. to compare the shared set of variants ( $\geq 3\%$ ,  $\leq 97\%$ )  
189 in the pre/post-transmission timepoints for each pair <sup>40</sup>. Maximum-likelihood estimates  
190 determined that a mean effective bottleneck size of 5 (99% CI: 1-10), 3 (99% CI: 1-7), and 2  
191 (99% CI: 1-3) best described each of the three cat transmission events evaluated here (**Fig 4**).  
192 This is in line with previous estimates for other respiratory viruses, including airborne  
193 transmission of seasonal influenza viruses in humans <sup>39</sup>. Additionally, it has been shown that the  
194 route of influenza transmission directly impacts the size of the transmission bottleneck <sup>17</sup>. It is  
195 important to note, however, that the cat transmission pairs evaluated here shared physical  
196 enclosure spaces so the route of transmission could be airborne, direct contact, fomite, or a  
197 combination of these.

## 198 Discussion

199 While SARS-CoV-2 continues to spread globally at an alarming rate, the vast majority of  
200 humans remain immunologically naive to this virus. Whether through ongoing human  
201 adaptation, spill-back events from other animal intermediates, or with the distribution of vaccines  
202 and therapeutics, the landscape of SARS-CoV-2 variation is certain to change. Understanding  
203 SARS-CoV-2 evolution within and between humans will facilitate our ability to uncover the  
204 evolutionary trajectories accessible to this virus as it faces changes in population-level  
205 immunity. Using domestic cats as a translational model, we show that genetic drift appears to  
206 be a major force shaping SARS-CoV-2 evolution. Selection within hosts is weak, and  
207 transmission bottlenecks, even with the potential for contact transmission, appear narrow.  
208 These observations suggest that SARS-CoV-2 may already be well adapted to mammalian  
209 hosts. The strong role of genetic drift may combine with the relatively slow mutation rate and  
210 narrow transmission bottlenecks to slow the overall pace of viral evolution.

211 Here we use deep viral sequencing to carefully uncover within-host variants in 6 domestic cats  
212 grouped into three defined transmission pairs. We find genetic drift and purifying selection  
213 shape SARS-CoV-2 genetic diversity within feline hosts, and a stringent bottleneck defines viral  
214 transmission. This latter finding is at odds with some recent studies in humans, which have  
215 estimated wide and variable SARS-CoV-2 transmission bottlenecks<sup>25–28</sup>. Our data, however, is  
216 in line with other narrow estimates<sup>25</sup>. These discordant estimates are likely due to a  
217 combination of factors including uncertain sources of infection, difficulty collecting samples  
218 which closely bookend the transmission event, and inaccurate variant calls<sup>25–28</sup>. These studies  
219 have commonly identified transmission pairs using intrahousehold infections diagnosed within a  
220 defined timeframe. A major weakness with this approach is the possibility that some of these  
221 cohabiting individuals will both share an alternative source of exposure. Furthermore, without

222 fine-scale epidemiological and clinical metadata, pinpointing the time of likely transmission is  
223 challenging, so even samples collected before and after a real transmission event may be  
224 several days removed from the time of transmission. Here, we were able to circumvent many of  
225 these challenges by taking advantage of domestic cats experimentally infected with SARS-CoV-  
226 2 arranged in defined transmission pairs with clinical monitoring and daily sample collection,  
227 making for a useful model system.

228 Reports of natural transmission from humans to cats lends credence to the idea that cats can  
229 serve as a viable model for studying transmission <sup>11,41–43</sup>. Like in humans, infectious SARS-CoV-  
230 2 virus can be recovered from cat nasal turbinates, soft palates, tonsils, tracheas, and lungs <sup>1</sup>.  
231 Respiratory droplet transmission, which is thought to drive SARS-CoV-2 infection in humans,  
232 has been repeatedly reported in cats <sup>44</sup>. However, it is still likely that cat-specific processes and  
233 characteristics impact patterns of SARS-CoV-2 evolution and transmission in this model system.  
234 Our study found that overall genetic diversity in cats was low and signatures support prominent  
235 roles for genetic drift and purifying selection. The combination of low genetic diversity, genetic  
236 drift, and purifying selection are in line with recent estimates of human within-host diversity <sup>25,27–</sup>  
237 <sup>32</sup>. Importantly, our study only evaluated three transmission pairs with an undefined mode of  
238 transmission in the context of a single human isolate. Future studies will need to further explore  
239 the role of respiratory droplet transmission among a larger cohort of cats <sup>43,45</sup>.

240 As has been demonstrated for other viruses, a narrow transmission bottleneck may act as a  
241 brake on the pace with which SARS-CoV-2 will be able to evade humoral immunity and antiviral  
242 therapeutics through the stochastic loss of beneficial variants before they become fixed <sup>12</sup>. The  
243 size of the transmission bottleneck may have additional implications for individual infections.  
244 The total number of founding virions, or the inoculum dose, has been posited to play a role in  
245 coronavirus disease 2019 (COVID-19) clinical severity and outcomes <sup>46,47</sup>. The relationship

246 between the size of the genetic bottleneck and inoculum dose is not entirely clear, but these are  
247 not synonymous concepts. For example, an infection founded by 1,000 genetically identical  
248 viruses would be categorized as resulting from a narrow genetic bottleneck but a relatively large  
249 inoculation dose, or population bottleneck. Furthermore, levels of viral genetic diversity have  
250 been linked to pathogenesis or clinical outcomes in the context of other viruses (e.g., influenza  
251 A virus, polio, and respiratory syncytial virus) and because narrow transmission bottlenecks  
252 reduce viral genetic diversity, bottlenecks may play an essential role in the outcome of individual  
253 infections in this way as well <sup>48–52</sup>. The relationship between SARS-CoV-2 viral genetic diversity  
254 and COVID-19 severity has been discussed, but remains unclear <sup>53,54</sup>.

255 Although within-host diversity was limited in the cats evaluated here, we identify two notable  
256 variants. S H655Y and E S67S arose rapidly, despite being found at 0.85% and 0.34% in the  
257 stock, and were detectable at intermediate frequencies at the first-day post-inoculation in all  
258 three index cats. S H655Y has been previously reported in other settings as well – natural  
259 SARS-CoV-2 infections in humans, transmission studies in a hamster model, as well as SARS-  
260 CoV-2 tissue culture experiments <sup>55–58</sup>. S H655Y is near the polybasic cleavage site, residing  
261 between the receptor binding domain and the fusion peptide, and is thought to modulate Spike  
262 glycoprotein fusion efficiency <sup>55,56,59</sup>. E S67S has not been documented elsewhere. Based on  
263 iSNV frequencies, S H655Y and E S67S appear to be in linkage with each other (see cat 2 and  
264 cat 5 in **Fig 3** in particular), however with short sequence reads and sequencing approaches  
265 relying on amplicon PCR, we cannot rigorously assess the extent of linkage disequilibrium  
266 between these variants. It may be that S H655Y arose on the genetic background of an existing  
267 S67S variant in envelope. If S H655Y facilitates viral replication in cats, viruses with this variant  
268 in linkage with E S67S might have been positively selected in all index cats.

269 Furthermore, S H655Y with E S67S were transmitted and fixed in contact cats in two of the  
270 three transmission events evaluated here. Although our sample size is small, the convergent  
271 origination of S H655Y with E S67S in all index cats and the fixation of these variants following  
272 transmission in two contact cats signals a potentially important functional role for one or both of  
273 these variants in feline hosts, and points towards a potential selective bottleneck. Although we  
274 cannot easily test this, if the transmission bottleneck were large and S H655Y, in linkage with E  
275 S67S, were rapidly selected in contact hosts immediately following transmission we might see a  
276 similar pattern to what we observe in cats 4 and 6. More generally, one challenge in interpreting  
277 these data is that we would expect to see a similar pattern of iSNVs in contact hosts following a  
278 narrow transmission bottleneck (as we suspect is the case here) as well as a wide transmission  
279 bottleneck in combination with a rapid selective sweep.

280 Large SARS-CoV-2 outbreaks in mink have been reported recently, some with ‘concerning’  
281 mutations that may evade human humoral immunity<sup>60</sup>. This resulted in the Danish authorities’  
282 decision to cull 17 million mink as a safeguard against spill-back transmission into humans<sup>60</sup>.  
283 Humans are currently the primary reservoir for SARS-CoV-2, but the mink example shows that  
284 SARS-CoV-2 is able to infect and transmit among other mammals with the potential for ongoing  
285 zoonosis and anthroponosis. This exemplifies the need to understand the evolutionary  
286 mechanisms and pace at which SARS-CoV-2 is able to adapt to, and transmit between a broad  
287 range of host species. In our study we see variants arising early and being transmitted onward  
288 in cats, a potential reservoir species. Our study and the mink example show that species- and  
289 context-specific adaptations are inevitable as SARS-CoV-2 explores new hosts. While we do  
290 not know the phenotypic impacts of these variants, the rapid rise of variants in potential  
291 reservoir species may significantly impact humans if exposed to these new species-specific  
292 SARS-CoV-2 adaptations.

293 As more than 300,000 new SARS-CoV-2 cases occur each day worldwide, we must have  
294 models in place to recapitulate key evolutionary factors influencing SARS-CoV-2 transmission.  
295 With the imminent release of SARS-CoV-2 vaccines and therapeutics and increasing incidence  
296 of natural exposure-related immunity, these models can help us forecast the future of SARS-  
297 CoV-2 variation and population-level genetic changes. Here, we use six domestic cats to show  
298 how SARS-CoV-2 genetic variation is predominantly influenced by genetic drift and purifying  
299 selection within individual hosts. Additionally, we find a role for narrow transmission bottlenecks  
300 shaping founding diversity in all three contact cats. Continued efforts to sequence SARS-CoV-2  
301 across a wide variety of hosts, transmission routes, and spatiotemporal scales will be necessary  
302 to determine the evolutionary and epidemiological forces responsible for shaping within-host  
303 genetic diversity into global viral variation.

## 304 Methods

### 305 Nucleic acid extraction

306 For each sample, approximately 140  $\mu$ L of viral transport medium was passed through a  
307 0.22 $\mu$ m filter (Dot Scientific, Burton, MI, USA). Total nucleic acid was extracted using the  
308 Qiagen QIAamp Viral RNA Mini Kit (Qiagen, Hilden, Germany), substituting carrier RNA with  
309 linear polyacrylamide (Invitrogen, Carlsbad, CA, USA) and eluting in 30  $\mu$ L of nuclease-free  
310 H<sub>2</sub>O.

### 311 Complementary DNA (cDNA) generation

312 Complementary DNA (cDNA) was synthesized using a modified ARTIC Network approach<sup>33,34</sup>.  
313 Briefly, RNA was reverse transcribed with SuperScript IV Reverse Transcriptase (Invitrogen,

314 Carlsbad, CA, USA) using random hexamers and dNTPs. Reaction conditions were as follows:  
315 1µL of random hexamers and 1µL of dNTPs were added to 11 µL of sample RNA, heated to  
316 65°C for 5 minutes, then cooled to 4°C for 1 minute. Then 7 µL of a master mix (4 µL 5x RT  
317 buffer, 1 µL 0.1M DTT, 1µL RNaseOUT RNase Inhibitor, and 1 µL SSIV RT) was added and  
318 incubated at 42°C for 10 minutes, 70°C for 10 minutes, and then 4°C for 1 minute.

## 319 Multiplex PCR for SARS-CoV-2 genomes

320 A SARS-CoV-2-specific multiplex PCR for Nanopore sequencing was performed, similar to  
321 amplicon-based approaches as previously described<sup>33,34</sup>. In short, primers for 96 overlapping  
322 amplicons spanning the entire genome with amplicon lengths of 500bp and overlapping by 75 to  
323 100bp between the different amplicons were used to generate cDNA. Primers used in this  
324 manuscript were designed by ARTIC Network and are shown in **Supplementary Table 3**. cDNA  
325 (2.5µL) was amplified in two multiplexed PCR reactions using Q5 Hot-Start DNA High-fidelity  
326 Polymerase (New England Biolabs, Ipswich, MA, USA) using the following cycling conditions;  
327 98°C for 30 seconds, followed by 25 cycles of 98°C for 15 seconds and 65°C for 5 minutes,  
328 followed by an indefinite hold at 4°C<sup>33,34</sup>. Following amplification, samples were pooled together  
329 before TrueSeq Illumina library prep.

## 330 TrueSeq Illumina library prep and sequencing

331 Amplified cDNA was purified using a 1:1 concentration of AMPure XP beads (Beckman Coulter,  
332 Brea, CA, USA) and eluted in 30µL of water. PCR products were quantified using Qubit dsDNA  
333 high-sensitivity kit (Invitrogen, USA) and were diluted to a final concentration of 2.5 ng/µl (150  
334 ng in 50 µl volume). Each sample was then made compatible with deep sequencing using the  
335 Nextera TruSeq sample preparation kit (Illumina, USA). Specifically, each sample was

336 enzymatically end repaired. Samples were purified using two consecutive AMPure bead  
337 cleanups (0.6x and 0.8x) and were quantified once more using Qubit dsDNA high-sensitivity kit  
338 (Invitrogen, USA). A non-templated nucleotide was attached to the 3' ends of each sample,  
339 followed by adaptor ligation. Samples were again purified using an AMPure bead cleanup (1x)  
340 and eluted in 25µL of resuspension buffer. Lastly, samples were amplified using 8 PCR cycles,  
341 cleaned with a 1:1 bead clean-up, and eluted in 30µL of RSB. The average sample fragment  
342 length and purity was determined using the Agilent High Sensitivity DNA kit and the Agilent  
343 2100 Bioanalyzer (Agilent, Santa Clara, CA). After passing quality control measures, samples  
344 were pooled equimolarly to a final concentration of 4 nM, and 5 µl of each 4 nM pool was  
345 denatured in 5 µl of 0.2 N NaOH for 5 min. Sequencing pools were denatured to a final  
346 concentration of 10 pM with a PhiX-derived control library accounting for 1% of total DNA and  
347 was loaded onto a 500-cycle v2 flow cell. Average quality metrics were recorded, reads were  
348 demultiplexed, and FASTQ files were generated on Illumina's BaseSpace platform.

## 349 Processing of the raw sequence data, mapping, and variant 350 calling

351 Raw FASTQ files were analyzed using a workflow called "SARSquencer". Briefly, reads are  
352 paired and merged using BBMerge ([https://jgi.doe.gov/data-and-tools/bbtools/bb-tools-user-  
353 guide/bbmerge-guide/](https://jgi.doe.gov/data-and-tools/bbtools/bb-tools-user-guide/bbmerge-guide/)) and mapped to the reference (MW219695.1) using BMAP  
354 (<https://jgi.doe.gov/data-and-tools/bbtools/bb-tools-user-guide/bbmap-guide/>). Mapped reads  
355 were imported into Geneious (<https://www.geneious.com/>) for visual inspection. Variants were  
356 called using callvariants.sh (contained within BMAP) and annotated using SnpEff  
357 (<https://pcingola.github.io/SnpEff/>). The complete "SARSquencer" pipeline is available in the  
358 GitHub accompanying this manuscript in `code/SARSquencer` as well as in a separate GitHub



359 repository – [https://github.com/gagekmoreno/SARS\\_CoV-2\\_Zequencer](https://github.com/gagekmoreno/SARS_CoV-2_Zequencer). BMap's output VCF  
360 files were cleaned using custom Python scripts, which can be found in the GitHub  
361 accompanying this manuscript  
362 ([https://github.com/katarinabraun/SARSCoV2\\_transmission\\_in\\_domestic\\_cats](https://github.com/katarinabraun/SARSCoV2_transmission_in_domestic_cats)). Variants were  
363 called at  $\geq 0.01\%$  in reads that were  $\geq 100$  bp in length and supported by a minimum of 10 reads.  
364 Only variants at  $\geq 3\%$  frequency in both technical replicates were used for downstream analysis.  
365 In addition, all variants occurring in ARTIC v3 primer-binding sites were discarded before  
366 proceeding with downstream analysis.

## 367 Quantification of SARS-CoV-2 vRNA

368 Plaque forming unit analysis was performed on all nasal swabs as published in Halfmann et al.  
369 2019<sup>11</sup>. Viral load analysis was performed on all of the nasal swab samples described above  
370 after they arrived in our laboratory. RNA was isolated using the Viral Total Nucleic Acid kit for  
371 the Maxwell RSC instrument (Promega, Madison, WI) following the manufacturer's instructions.  
372 Viral load quantification was performed using a sensitive qRT-PCR assay developed by the  
373 CDC to detect SARS-CoV-2 (specifically the N1 assay) and commercially available from  
374 IDT (Coralville, IA). The assay was run on a LightCycler 96 or LC480 instrument (Roche,  
375 Indianapolis, IN) using the Taqman Fast Virus 1-stepMaster Mix enzyme (Thermo Fisher,  
376 Waltham, MA). The limit of detection of this assay is estimated to be 200 genome  
377 equivalents/ml saliva or swab fluid. To determine the viral load, samples were interpolated onto  
378 a standard curve consisting of serial 10-fold dilutions of in vitro transcribed SARS-CoV-2 N gene  
379 RNA.

## 380 Pairwise nucleotide diversity calculations

381 Nucleotide diversity was calculated using  $\pi$  summary statistics (**Supplementary Table 2**).  $\pi$   
382 quantifies the average number of pairwise differences per nucleotide site among a set of  
383 sequences and was calculated per gene using SNPGenie  
384 (<https://github.com/chasewnelson/SNPgenie>)<sup>61</sup>. SNPGenie adapts the Nei and Gojobori  
385 method of estimating nucleotide diversity ( $\pi$ ), and its synonymous ( $\pi_S$ ) and nonsynonymous  
386 ( $\pi_N$ ) partitions from next-generation sequencing data<sup>62</sup>. When  $\pi_N = \pi_S$ , this indicates neutral  
387 evolution or genetic drift, with neither strong purifying nor positive selection playing a large role  
388 in the evolution of the viral population.  $\pi_N < \pi_S$  indicates purifying selection is acting to remove  
389 deleterious mutations, and  $\pi_N > \pi_S$  shows positive or diversifying selection acting on  
390 nonsynonymous variation<sup>63</sup>. We tested the null hypothesis that  $\pi_N = \pi_S$  within each gene using  
391 an unpaired t-test (**Supplementary Table 1**). The code to replicate these results can be found  
392 in the `diversity\_estimates.ipynb` Jupyter Notebook in the `code` directory of the GitHub  
393 repository.

## 394 SNP Frequency Spectrum calculations

395 To generate SNP Frequency Spectrums (SFS), we binned all variants detected across  
396 timepoints within each index cat into six bins – 3-10%, 10-20%, 20-30%, 30-40%, 40-50%, 50-  
397 60%. We plotted the counts of variants falling into each frequency bin using Matplotlib 3.3.2  
398 (<https://matplotlib.org>). We used code written by Dr. Louise Moncla to generate the distribution  
399 of SNPs for a given population assuming no selection or change in population size, which is  
400 expected to follow a  $1/x$  distribution<sup>36</sup>. The code to replicate this can be found in the GitHub  
401 accompanying this manuscript, specifically in the `code/SFS.ipynb` Jupyter Notebook. This  
402 model predicts 42.8% of variants will fall within the 3-10% frequency range, 24.6% will fall within

403 the 10-20% frequency range, 14.4% of variants will fall within the 20-30% frequency range,  
404 10.2% of variants will fall within the 30-40% frequency range, and 7.9% of variants will fall within  
405 the 40-50% frequency range. We used a Mann-Whitney U test to test the null hypothesis that  
406 the distribution of variant frequencies for each index cat was equal to the neutral distribution.  
407 The code to replicate these results can be found in the `SFS.ipynb` Jupyter Notebook in the  
408 `code` directory of the GitHub repository.

## 409 Data availability

410 Source data after have been deposited in the Sequence Read Archive (SRA) under bioproject  
411 PRJNA666926[<https://www.ncbi.nlm.nih.gov/bioproject/666926>]. The consensus genome  
412 sequences for national and international genomes are available from GISAID ([www.gisaid.org](http://www.gisaid.org);  
413 see Supplementary Table 3). Derived data, analysis pipelines, and figures have been made  
414 available for easy replication of these results at a publically-accessible GitHub repository:  
415 [https://github.com/katarinabraun/SARSCoV2\\_transmission\\_in\\_domestic\\_cats](https://github.com/katarinabraun/SARSCoV2_transmission_in_domestic_cats).

## 416 Code availability

417 Code to replicate analyses and re-create most figures is available at  
418 [https://github.com/katarinabraun/SARSCoV2\\_transmission\\_in\\_domestic\\_cats](https://github.com/katarinabraun/SARSCoV2_transmission_in_domestic_cats). **Figure 1** was  
419 created by hand in Adobe Illustrator and **Supplementary Figures 2 and 3** were created using  
420 samtools command line tools, were visualized in JMP Pro 15  
421 ([https://www.jmp.com/en\\_in/software/new-release/new-in-jmp-and-jmp-pro.html](https://www.jmp.com/en_in/software/new-release/new-in-jmp-and-jmp-pro.html)), and were then  
422 edited for readability in Adobe Illustrator. Code to process sequencing data is available at  
423 [https://github.com/gagekmoreno/SARS\\_CoV-2\\_Zequencer](https://github.com/gagekmoreno/SARS_CoV-2_Zequencer) and dependencies are available  
424 through Docker<sup>64</sup>. Results were visualized using Matplotlib 3.3.2(<https://matplotlib.org>),

425 Seaborn v0.10.0 (<https://github.com/mwaskom/seaborn>), and Baltic v0.1.0  
426 (<https://github.com/evogytis/baltic>).

## 427 Acknowledgements

428 This project was funded in part through a COVID-19 Response grant from the Wisconsin  
429 Partnership Program at the University of Wisconsin School of Medicine and Public Health to  
430 TCF and DHO. KMB is supported by F30 AI145182-01A1 from the National Institute of Allergy  
431 and Infectious Disease. GKM is supported by an NLM training grant to the Computation and  
432 Informatics in Biology and Medicine Training Program (NLM 5T15LM007359). We thank  
433 Chelsea Crooks for her careful reading of and comments on this manuscript.

## 434 Author Contributions

435 K.M.B. contributed conceptualization, data curation, formal analysis, investigation, methodology,  
436 project administration, software, visualization, writing – original draft preparation, writing –  
437 review and editing.

438 G.K.M. contributed conceptualization, data curation, formal analysis, investigation,  
439 methodology, project administration, software, visualization, writing – original draft preparation,  
440 writing – review and editing.

441 P.J.H. contributed conceptualization, data curation, investigation, methodology, project  
442 administration, resources, writing – review and editing.

443 E.B. contributed – visualization, writing – original draft preparation, writing – review and editing. .

444 A.M.W. contributed investigation, writing – review and editing.

445 A.K.H. contributed formal analysis, writing – review and editing.

446 M.H. contributed conceptualization, resources, writing – review and editing.

447 S.C. contributed conceptualization, resources, supervision, writing – review and editing.

448 T.M. contributed conceptualization, resources, supervision, writing – review and editing.

449 Y.K. contributed conceptualization, resources, supervision, writing – review and editing.

450 K.K. contributed conceptualization, methodology, software, supervision, writing – review and  
451 editing.

452 D.H.O. contributed conceptualization, funding acquisition, methodology, supervision, writing –  
453 review and editing.

454 T.C.F. contributed conceptualization, funding acquisition, methodology, supervision, writing –  
455 review and editing.

## 456 Competing Interests

457 The authors declare no competing interests.

458

459

## 460 References

461 1. Shi, J. et al. Susceptibility of ferrets, cats, dogs, and other domesticated animals to SARS-  
462 coronavirus 2. *Science* **368**, 1016-1020 (2020).

463 2. Rockx, B. et al. Comparative pathogenesis of COVID-19, MERS, and SARS in a  
464 nonhuman primate model. *Science* **368**, 1012-1015 (2020).

- 465 3. Imai, M. et al. Syrian hamsters as a small animal model for SARS-CoV-2 infection and  
466 countermeasure development. *Proc Natl Acad Sci U S A* **117**, 16587-16595 (2020).
- 467 4. Shan, C. et al. Infection with novel coronavirus (SARS-CoV-2) causes pneumonia in  
468 Rhesus macaques. *Cell Res* **30**, 670-677 (2020).
- 469 5. Oreshkova, N. et al. SARS-CoV-2 infection in farmed minks, the Netherlands, April and  
470 May 2020. *Euro Surveill* **25**, (2020).
- 471 6. Lakdawala, S. S. & Menachery, V. D. The search for a COVID-19 animal model. *Science*  
472 **368**, 942-943 (2020).
- 473 7. Richard, M. et al. SARS-CoV-2 is transmitted via contact and via the air between ferrets.  
474 *Nat Commun* **11**, 3496 (2020).
- 475 8. Oude Munnink, B. B. et al. Transmission of SARS-CoV-2 on mink farms between humans  
476 and mink and back to humans. *Science* (2020).
- 477 9. Park, S. E. Epidemiology, virology, and clinical features of severe acute respiratory  
478 syndrome -coronavirus-2 (SARS-CoV-2; Coronavirus Disease-19). *Clin Exp Pediatr* **63**,  
479 119-124 (2020).
- 480 10. Yang, X. et al. Clinical course and outcomes of critically ill patients with SARS-CoV-2  
481 pneumonia in Wuhan, China: a single-centered, retrospective, observational study. *Lancet*  
482 *Respir Med* **8**, 475-481 (2020).
- 483 11. Halfmann, P. J. et al. Transmission of SARS-CoV-2 in Domestic Cats. *N Engl J Med* **383**,  
484 592-594 (2020).
- 485 12. McCrone, J. T. & Luring, A. S. Genetic bottlenecks in intraspecies virus transmission.  
486 *Curr Opin Virol* **28**, 20-25 (2018).
- 487 13. McCrone, J. T. et al. Stochastic processes constrain the within and between host evolution  
488 of influenza virus. *Elife* **7**, (2018).

- 489 14. Valesano, A. L. et al. Influenza B Viruses Exhibit Lower Within-Host Diversity than  
490 Influenza A Viruses in Human Hosts. *J Virol* **94**, (2020).
- 491 15. Wilker, P. R. et al. Selection on haemagglutinin imposes a bottleneck during mammalian  
492 transmission of reassortant H5N1 influenza viruses. *Nat Commun* **4**, 2636 (2013).
- 493 16. Moncla, L. H. et al. Selective Bottlenecks Shape Evolutionary Pathways Taken during  
494 Mammalian Adaptation of a 1918-like Avian Influenza Virus. *Cell Host Microbe* **19**, 169-  
495 180 (2016).
- 496 17. Varble, A. et al. Influenza A virus transmission bottlenecks are defined by infection route  
497 and recipient host. *Cell Host Microbe* **16**, 691-700 (2014).
- 498 18. Zaraket, H. et al. Mammalian adaptation of influenza A(H7N9) virus is limited by a narrow  
499 genetic bottleneck. *Nat Commun* **6**, 6553 (2015).
- 500 19. Xue, K. S. & Bloom, J. D. Reconciling disparate estimates of viral genetic diversity during  
501 human influenza infections. *Nat Genet* **51**, 1298-1301 (2019).
- 502 20. Bergstrom, C. T., McElhany, P. & Real, L. A. Transmission bottlenecks as determinants of  
503 virulence in rapidly evolving pathogens. *Proc Natl Acad Sci U S A* **96**, 5095-5100 (1999).
- 504 21. Elena, S. F., Sanjuán, R., Bordería, A. V. & Turner, P. E. Transmission bottlenecks and  
505 the evolution of fitness in rapidly evolving RNA viruses. *Infect Genet Evol* **1**, 41-48 (2001).
- 506 22. Dinis, J. M. et al. Deep Sequencing Reveals Potential Antigenic Variants at Low  
507 Frequencies in Influenza A Virus-Infected Humans. *J Virol* **90**, 3355-3365 (2016).
- 508 23. Kiso, M. et al. Emergence of Oseltamivir-Resistant H7N9 Influenza Viruses in  
509 Immunosuppressed Cynomolgus Macaques. *J Infect Dis* **216**, 582-593 (2017).
- 510 24. Zwart, M. P. & Elena, S. F. Matters of Size: Genetic Bottlenecks in Virus Infection and  
511 Their Potential Impact on Evolution. *Annu Rev Virol* **2**, 161-179 (2015).
- 512 25. Wang, D. et al. Population Bottlenecks and Intra-host Evolution during Human-to-Human  
513 Transmission of SARS-CoV-2. *bioRxiv* 2020.06.26.173203 (2020).

- 514 26. Lythgoe, K. A. et al. Shared SARS-CoV-2 diversity suggests localised transmission of  
515 minority variants. *bioRxiv* 2020.05.28.118992 (2020).
- 516 27. Popa, A. et al. Mutational dynamics and transmission properties of SARS-CoV-2  
517 superspreading events in Austria. *bioRxiv* 2020.07.15.204339 (2020).
- 518 28. Graudenzi, A., Maspero, D., Angaroni, F., Piazza, R. & Ramazzotti, D. Mutational  
519 Signatures and Heterogeneous Host Response Revealed Via Large-Scale  
520 Characterization of SARS-COV-2 Genomic Diversity. *bioRxiv* 2020.07.06.189944 (2020).
- 521 29. Sapoval, N. et al. Hidden genomic diversity of SARS-CoV-2: implications for qRT-PCR  
522 diagnostics and transmission. *bioRxiv* (2020).
- 523 30. Karamitros, T. et al. SARS-CoV-2 exhibits intra-host genomic plasticity and low-frequency  
524 polymorphic quasispecies. *J Clin Virol* **131**, 104585 (2020).
- 525 31. Shen, Z. et al. Genomic diversity of SARS-CoV-2 in Coronavirus Disease 2019 patients.  
526 *Clin Infect Dis* (2020).
- 527 32. Ramazzotti, D. et al. VERSO: a comprehensive framework for the inference of robust  
528 phylogenies and the quantification of intra-host genomic diversity of viral samples. *bioRxiv*  
529 2020.04.22.044404 (2020).
- 530 33. Quick, J. et al. Multiplex PCR method for MinION and Illumina sequencing of Zika and  
531 other virus genomes directly from clinical samples. *Nat Protoc* **12**, 1261-1276 (2017).
- 532 34. Quick, J. nCoV-2019 sequencing protocol. *protocols.io* (2020).
- 533 35. Grubaugh, N. D. et al. An amplicon-based sequencing framework for accurately  
534 measuring intrahost virus diversity using PrimalSeq and iVar. *Genome Biol* **20**, 8 (2019).
- 535 36. Moncla, L. H. et al. Quantifying within-host diversity of H5N1 influenza viruses in humans  
536 and poultry in Cambodia. *PLoS Pathog* **16**, e1008191 (2020).
- 537 37. Hahn, M. W. *Molecular population genetics* (New York: Sinauer Associates., 2019).



- 538 38. Zhao, L. & Illingworth, C. J. R. Measurements of intrahost viral diversity require an  
539 unbiased diversity metric. *Virus Evol* **5**, vey041 (2019).
- 540 39. Rausch, J. W., Capoferri, A. A., Katusiime, M. G., Patro, S. C. & Kearney, M. F. Low  
541 genetic diversity may be an Achilles heel of SARS-CoV-2. *Proc Natl Acad Sci U S A* **117**,  
542 24614-24616 (2020).
- 543 40. Sobel Leonard, A., Weissman, D. B., Greenbaum, B., Ghedin, E. & Koelle, K.  
544 Transmission Bottleneck Size Estimation from Pathogen Deep-Sequencing Data, with an  
545 Application to Human Influenza A Virus. *J Virol* **91**, (2017).
- 546 41. Segalés, J. et al. Detection of SARS-CoV-2 in a cat owned by a COVID-19-affected  
547 patient in Spain. *Proc Natl Acad Sci U S A* **117**, 24790-24793 (2020).
- 548 42. Bosco-Lauth, A. M. et al. Experimental infection of domestic dogs and cats with SARS-  
549 CoV-2: Pathogenesis, transmission, and response to reexposure in cats. *Proc Natl Acad*  
550 *Sci U S A* **117**, 26382-26388 (2020).
- 551 43. Barrs, V. R. et al. SARS-CoV-2 in Quarantined Domestic Cats from COVID-19  
552 Households or Close Contacts, Hong Kong, China. *Emerg Infect Dis* **26**, (2020).
- 553 44. Prather, K. A. et al. Airborne transmission of SARS-CoV-2. *Science* **370**, 303-304 (2020).
- 554 45. Hosie, M. J. et al. Respiratory disease in cats associated with human-to-cat transmission  
555 of SARS-CoV-2 in the UK. *bioRxiv* 2020.09.23.309948 (2020).
- 556 46. Guallar, M. P. et al. Inoculum at the time of SARS-CoV-2 exposure and risk of disease  
557 severity. *Int J Infect Dis* **97**, 290-292 (2020).
- 558 47. Gandhi, M., Beyrer, C. & Goosby, E. Masks Do More Than Protect Others During COVID-  
559 19: Reducing the Inoculum of SARS-CoV-2 to Protect the Wearer. *J Gen Intern Med* **35**,  
560 3063-3066 (2020).
- 561 48. Tanaka, Y. & Mizokami, M. Genetic diversity of hepatitis B virus as an important factor  
562 associated with differences in clinical outcomes. *J Infect Dis* **195**, 1-4 (2007).

- 563 49. Tahamtan, A., Askari, F. S., Bont, L. & Salimi, V. Disease severity in respiratory syncytial  
564 virus infection: Role of host genetic variation. *Rev Med Virol* **29**, e2026 (2019).
- 565 50. Xiao, Y. et al. Poliovirus intrahost evolution is required to overcome tissue-specific innate  
566 immune responses. *Nat Commun* **8**, 375 (2017).
- 567 51. Vignuzzi, M., Stone, J. K., Arnold, J. J., Cameron, C. E. & Andino, R. Quasispecies  
568 diversity determines pathogenesis through cooperative interactions in a viral population.  
569 *Nature* **439**, 344-348 (2006).
- 570 52. Memoli, M. J. et al. In vivo evaluation of pathogenicity and transmissibility of influenza  
571 A(H1N1)pdm09 hemagglutinin receptor binding domain 222 intrahost variants isolated  
572 from a single immunocompromised patient. *Virology* **428**, 21-29 (2012).
- 573 53. Biswas, S. K. & Mudi, S. R. Genetic variation in SARS-CoV-2 may explain variable  
574 severity of COVID-19. *Med Hypotheses* **143**, 109877 (2020).
- 575 54. Zhang, X. et al. Viral and host factors related to the clinical outcome of COVID-19. *Nature*  
576 **583**, 437-440 (2020).
- 577 55. Baum, A. et al. Antibody cocktail to SARS-CoV-2 spike protein prevents rapid mutational  
578 escape seen with individual antibodies. *Science* **369**, 1014-1018 (2020).
- 579 56. Dieterle, M. E. et al. A replication-competent vesicular stomatitis virus for studies of SARS-  
580 CoV-2 spike-mediated cell entry and its inhibition. *bioRxiv* (2020).
- 581 57. Chan, J. F. et al. Simulation of the clinical and pathological manifestations of Coronavirus  
582 Disease 2019 (COVID-19) in golden Syrian hamster model: implications for disease  
583 pathogenesis and transmissibility. *Clin Infect Dis* (2020).
- 584 58. YANG, X., Dong, N., CHAN, W.-C. & CHEN, S. Identification of super-transmitters of  
585 SARS-CoV-2. *medRxiv* 2020.04.19.20071399 (2020).

- 586 59. Huang, Y., Yang, C., Xu, X. F., Xu, W. & Liu, S. W. Structural and functional properties of  
587 SARS-CoV-2 spike protein: potential antiviral drug development for COVID-19. *Acta*  
588 *Pharmacol Sin* **41**, 1141-1149 (2020).
- 589 60. Organization, W. H. SARS-CoV-2 mink-associated variant strain – Denmark. *Disease*  
590 *Outbreak News* (2020). [https://www.who.int/csr/don/06-november-2020-mink-associated-](https://www.who.int/csr/don/06-november-2020-mink-associated-sars-cov2-denmark/en/)  
591 [sars-cov2-denmark/en/](https://www.who.int/csr/don/06-november-2020-mink-associated-sars-cov2-denmark/en/)
- 592 61. Nelson, C. W., Moncla, L. H. & Hughes, A. L. SNPGenie: estimating evolutionary  
593 parameters to detect natural selection using pooled next-generation sequencing data.  
594 *Bioinformatics* **31**, 3709-3711 (2015).
- 595 62. Nei, M. & Gojobori, T. Simple methods for estimating the numbers of synonymous and  
596 nonsynonymous nucleotide substitutions. *Mol Biol Evol* **3**, 418-426 (1986).
- 597 63. Hughes, A. L. & Hughes, P. B. S. A. L. *Adaptive Evolution of Genes and Genomes* (Oxford  
598 University Press, 1999).
- 599 64. Moreno, G. K. gagekmoreno/SARS\_CoV-2\_Zequencer: Zequencer to accompany  
600 “Transmission of SARS-CoV-2 in domestic cats imposes a narrow bottleneck”. *GitHub*  
601 (2020).
- 602

603 **Figures**

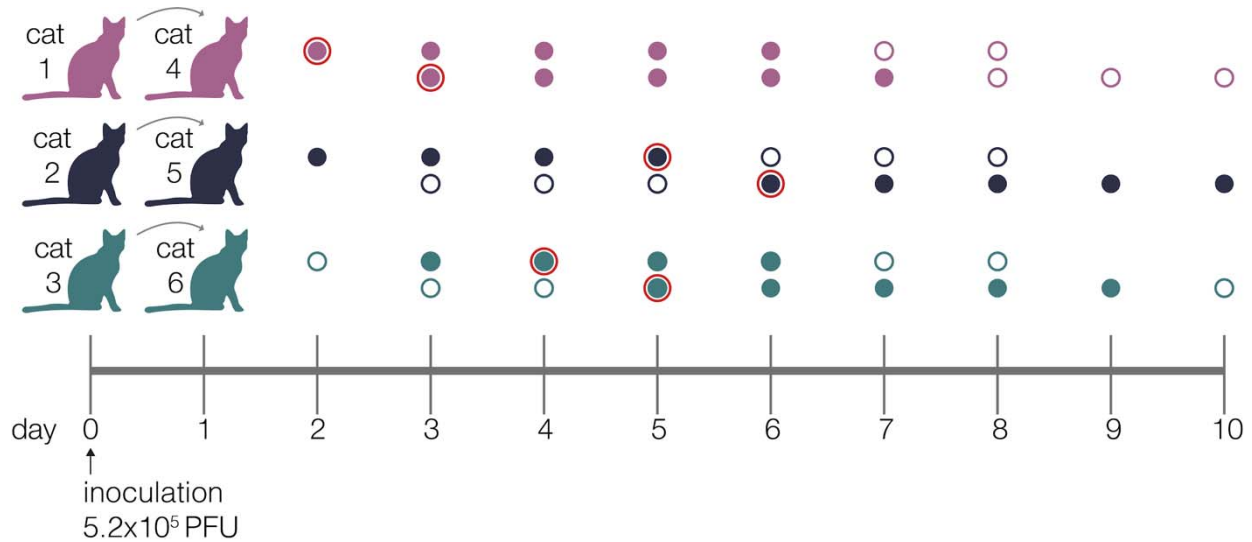

604

605 **Figure 1. Experimental timeline.** Schematic representing the sampling timeline for the three  
606 transmission pairs. Index cats were inoculated on day 0 with 5.2e5 PFU of a human isolate (hCoV-  
607 19/Japan/UT-NCGM02/2020) and were co-housed with a naive cat starting on day 1. Within each  
608 transmission pair, the top row of circles represent the index cat and the bottom row represents the contact  
609 cat. Open circles represent days on which there was no detectable infectious virus as indicated by plaque  
610 assay, and closed circles highlight days when live virus was recovered. Circles with a red outline indicate  
611 timepoints which were used in the betabinomial estimate to calculate transmission bottleneck sizes.

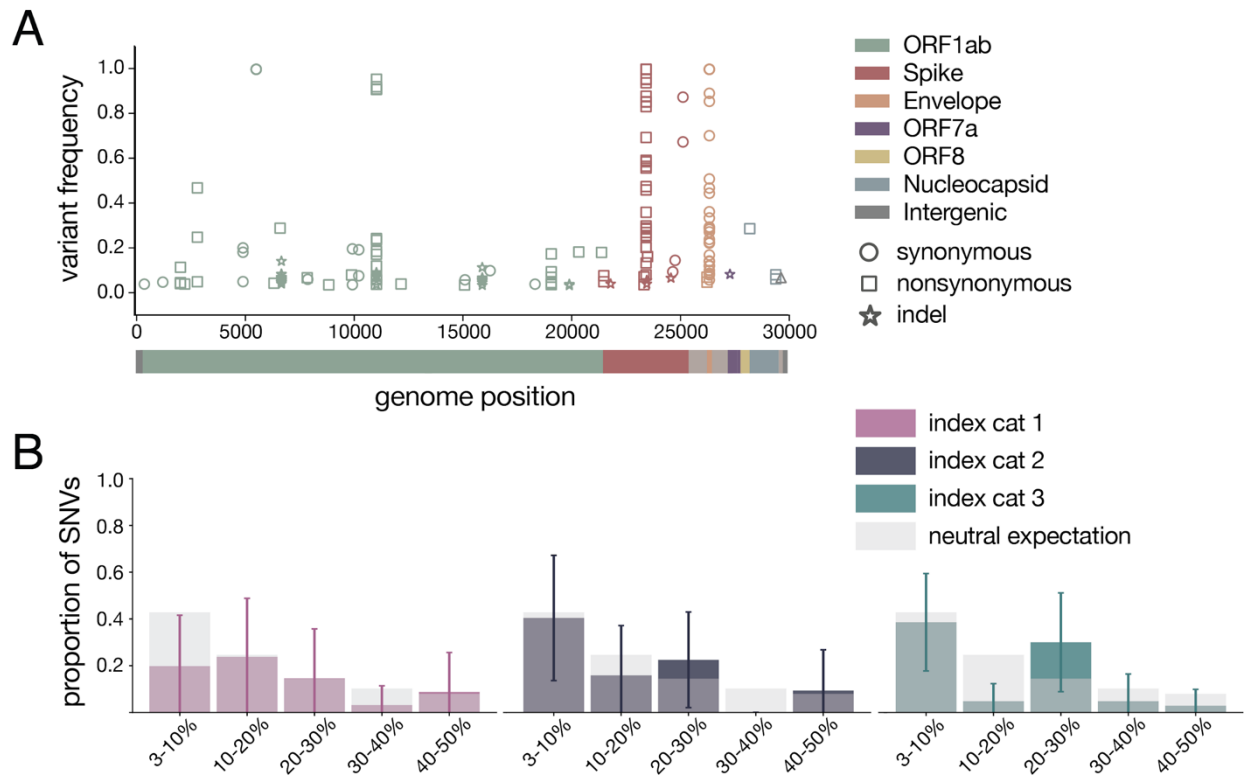

612

613 **Figure 2. Within-host diversity of SARS-CoV-2 viruses in domestic cats.** A) Plot representing all  
614 variants (iSNVs and indels) detected in any cat at any timepoint. Variant frequencies are plotted by  
615 genome location and are colored by gene. Circles represent synonymous iSNVs, squares represent  
616 nonsynonymous iSNVs, and stars represent indels. B) iSNV frequency spectrums with error bars showing  
617 standard deviation for index cats plotted against a “neutral model” (light gray bars) which assumes a  
618 constant population size and the absence of selection.

619

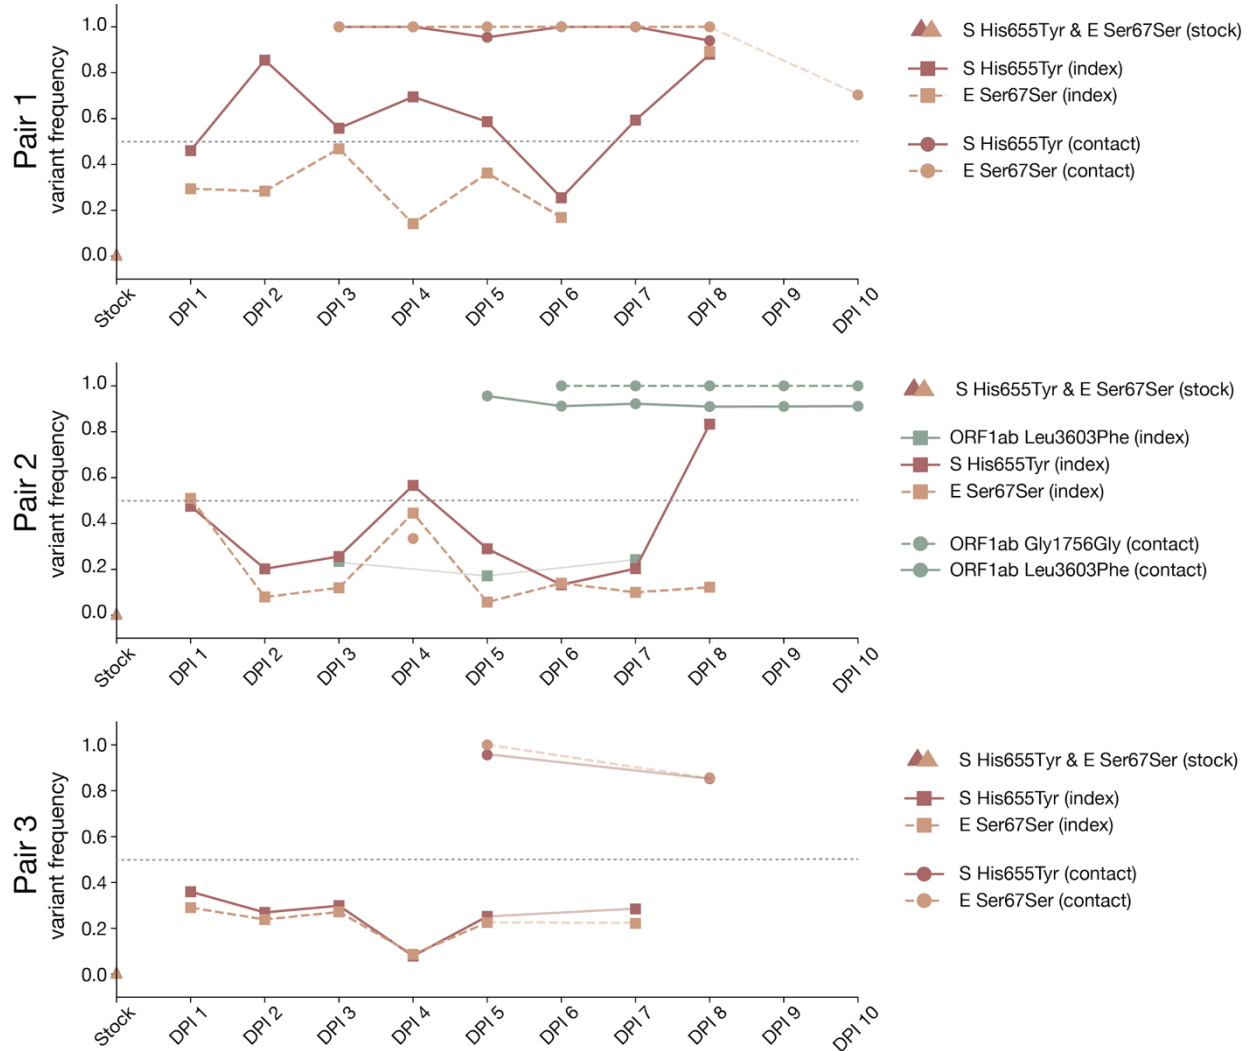

620

621 **Figure 3. Frequency of iSNVs over time in each index and contact cat.** The frequency of iSNVs  
 622 discussed in the results over time in all six cats are shown. All iSNVs over time are shown in  
 623 **Supplementary Figure 6** and all indels over time are shown in **Supplementary Figure 7**. Each variant is  
 624 colored by gene location. Nonsynonymous variants are plotted with solid lines and synonymous variants  
 625 are plotted with dashed lines. Variants detected in index cats are denoted with squares and variants  
 626 detected in contact cats are denoted with circles. Timepoints with viral loads too low to yield high quality  
 627 sequences are shown by the gaps in data, but iSNVs are connected across these gaps using light lines  
 628 for readability (i.e. cat 1 day 9). The dotted line at 50% frequency represents the consensus threshold.

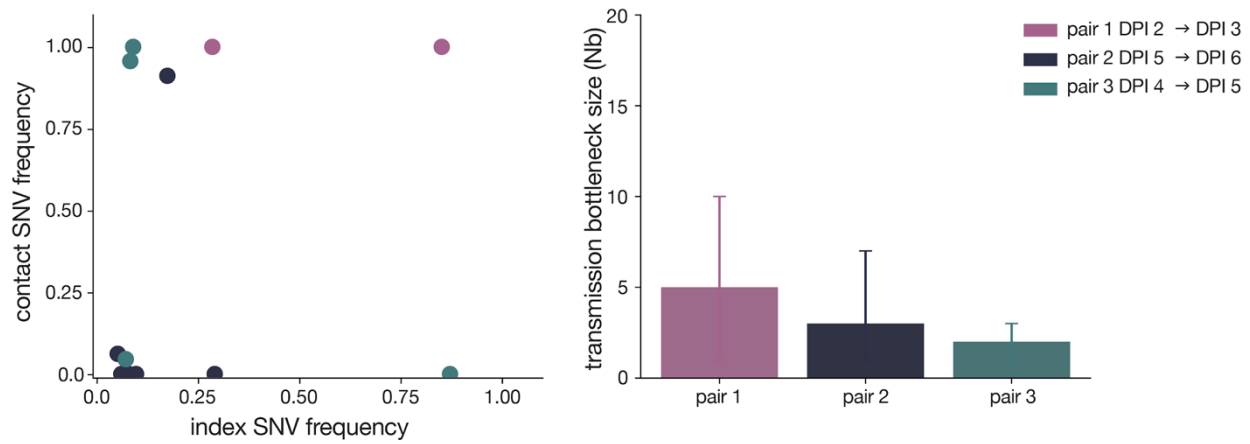

629

630 **Figure 4. SARS-CoV-2 transmission is defined by a narrow bottleneck.** Variant frequencies in the  
631 index cats (x-axis) compared with frequencies of the same variants in the corresponding contact cats (y-  
632 axis) that were used in the beta-binomial estimate are shown on the left. Estimates of SARS-CoV-2  
633 transmission bottleneck with 99% confidence intervals shown on the right.

634
